# Supplementary material for: Radix Paeoniae Rubra stimulates osteoclast differentiation by activation of the NF-κB and mitogen-activated protein kinase pathways
Source: Springer Nature journal article supplement (doi:10.1186/s12906-018-2196-7), 2018-04-23

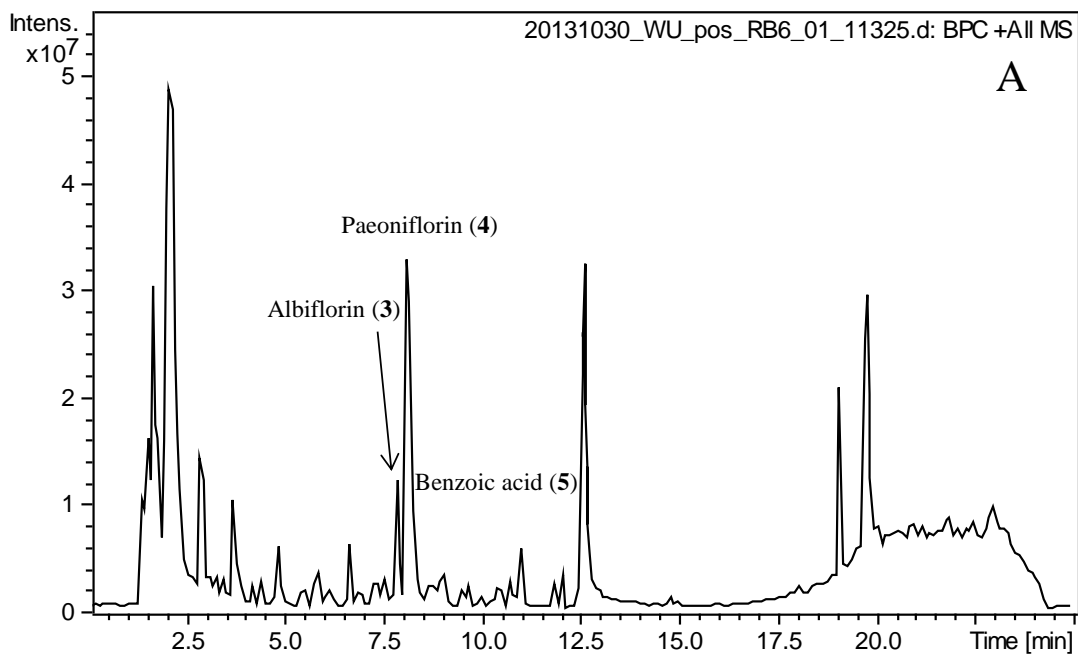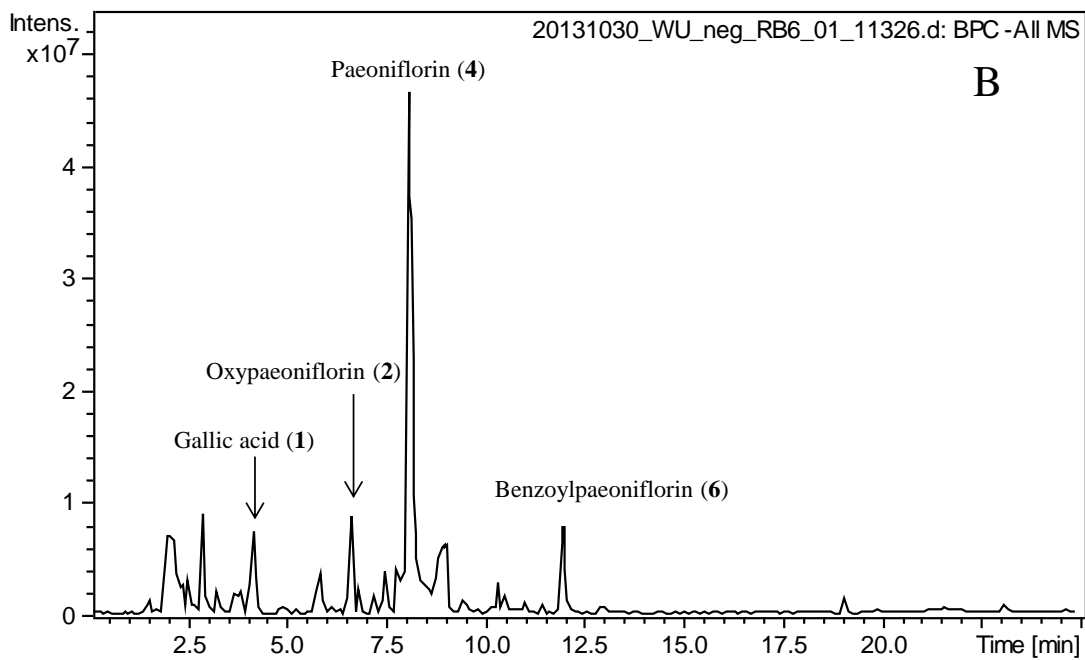

Supplement: MOESM1 [file 15713968]
