# Supplementary material for: Radix Paeoniae Rubra stimulates osteoclast differentiation by activation of the NF-κB and mitogen-activated protein kinase pathways
Source: Springer Nature journal article supplement (doi:10.1186/s12906-018-2196-7), 2018-04-23
Supplement: MOESM2 [file 15713968]

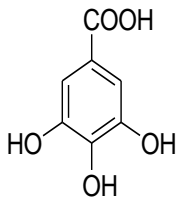

Gallic acid (1)

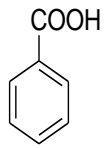

Benzoic acid (5)

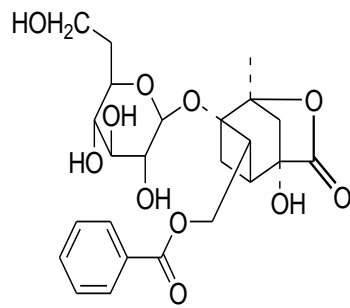

Albiflorin (3)

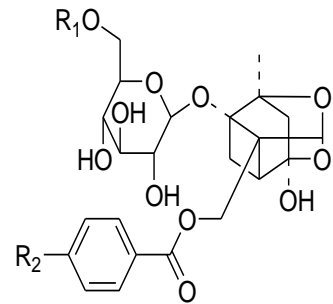

Oxypaeoniflorin (2) R<sub>1</sub>=H, R<sub>2</sub>=OH

Paeoniflorin (4) R<sub>1</sub>=H, R<sub>2</sub>=H

Benzoylpaeoniflorin (6) R<sub>1</sub>=C<sub>7</sub>H<sub>5</sub>O, R<sub>2</sub>=H
